# Supplementary material
Source: PubMed Central journal article supplement (PMC518832)

**A. IB:anti-mPNGase**

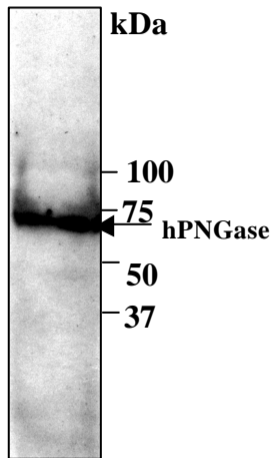

**B. IB:anti-HA**

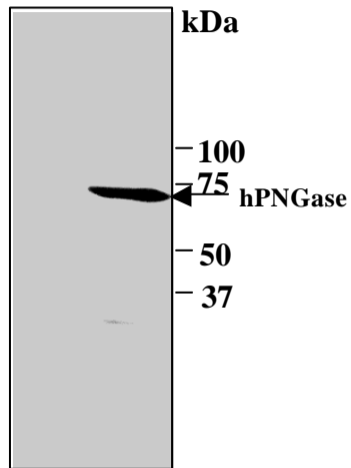

**Lane 1 2**

**C. IB-anti-hS4 D. IB: anti-hHR23B**

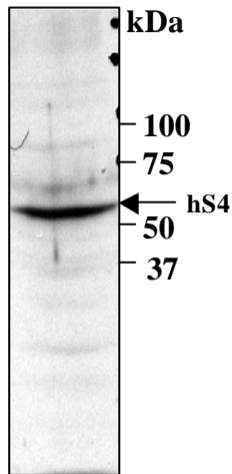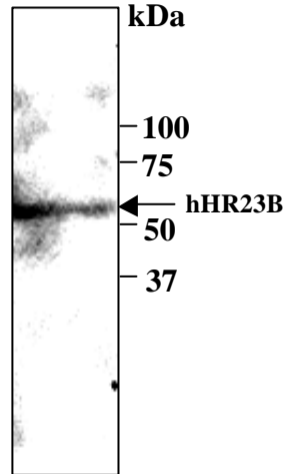

Supplement: pnas_101_38_13774__1.pdf [file pnas_101_38_13774__1.pdf]
